# Supplementary material for: Rates of solvent exchange in aqueous aluminium(iii)–maltolate complexes
Source: Royal Society of Chemistry journal article supplement (doi:10.1039/b110457h), 2002-01-01
Supplement: b110457h.pdf [file b110457h.pdf]

Table ESI 1 Equilibrium constants used to model the solution speciation. L = maltoate.

| Reaction                                                                                                                        | <sup>*</sup> log β <sub>i</sub><br>(I=0.6) | log ∏ γ <sub>i</sub><br>(I=0.6) | log ∏ γ <sub>i</sub><br>(I=1.5) | log β <sub>i</sub><br>(I=1.5) |
|---------------------------------------------------------------------------------------------------------------------------------|--------------------------------------------|---------------------------------|---------------------------------|-------------------------------|
| HL ↔ H <sup>+</sup> + L <sup>-</sup>                                                                                            | -8.3810                                    | -0.3226                         | -0.2529                         | -8.3113                       |
| Al <sup>3+</sup> + HL ↔ AlL <sup>2+</sup> + H <sup>+</sup>                                                                      | -0.1300                                    | 0.4653                          | 0.0559                          | -0.5394                       |
| Al <sup>3+</sup> + 2HL ↔ AlL <sub>2</sub> <sup>+</sup> + 2H <sup>+</sup>                                                        | -0.9560                                    | 0.6679                          | 0.0088                          | -1.6151                       |
| Al <sup>3+</sup> + 3HL ↔ AlL <sub>3</sub> + 3H <sup>+</sup>                                                                     | -2.6690                                    | 0.6079                          | -0.1412                         | -3.4181                       |
| 2Al <sup>3+</sup> + 2HL + 2H <sub>2</sub> O ↔ Al <sub>2</sub> L <sub>2</sub> (OH) <sub>2</sub> <sup>2+</sup> + 4 H <sup>+</sup> | -7.2030                                    | 1.1932                          | 0.2148                          | -8.1814                       |
| Al <sup>3+</sup> + H <sub>2</sub> O ↔ Al(OH) <sup>2+</sup> + H <sup>+</sup>                                                     | -5.5200                                    | -1.8386                         | -0.7205                         | -4.4019                       |
| Al <sup>3+</sup> + 2H <sub>2</sub> O ↔ Al(OH) <sub>2</sub> <sup>+</sup> + 2H <sup>+</sup>                                       | -11.300                                    | 0.7879                          | 0.3088                          | -11.7791                      |
| Al <sup>3+</sup> + 3H <sub>2</sub> O ↔ Al(OH) <sub>3</sub> + 3H <sup>+</sup>                                                    | -17.300                                    | 0.7879                          | 0.3088                          | -17.7791                      |
| Al <sup>3+</sup> + 4H <sub>2</sub> O ↔ Al(OH) <sub>4</sub> <sup>-</sup> + 4H <sup>+</sup>                                       | -23.500                                    | 0.5253                          | 0.2059                          | -23.8194                      |
| 13Al <sup>3+</sup> + 18H <sub>2</sub> O ↔ Al <sub>13</sub> <sup>7+</sup> + 32H <sup>+</sup>                                     | -105.50                                    | 4.7277                          | 1.8536                          | -108.374                      |

<sup>\*</sup>Data from Hedlund and Öhman<sup>9</sup> combined with those compiled in Phillips et al.<sup>13</sup>

Table ESI 2: Aluminum and oxygen speciation in the Al(III)-maltolate complexes based on  $^{27}\text{Al}$  NMR

| Temp<br>(°C) | Aluminum speciation |                     |                    |                  | pH                        |                           | Oxygen speciation* |                     |                    |
|--------------|---------------------|---------------------|--------------------|------------------|---------------------------|---------------------------|--------------------|---------------------|--------------------|
|              | $\text{Al}^{3+}$    | $\text{Al(L)}^{2+}$ | $\text{Al(L)}_2^+$ | $\text{Al(L)}_3$ | $\text{pH}_{\text{calc}}$ | $\text{pH}_{\text{meas}}$ | $\text{Al}^{3+}$   | $\text{Al(L)}^{2+}$ | $\text{Al(L)}_2^+$ |
| 32-68-4      |                     |                     |                    |                  |                           |                           |                    |                     |                    |
| 60           | 0.0425              | 0.3836              | 0.5147             | 0.0592           | 2.81                      | 2.8                       | 0.0905             | 0.5443              | 0.3652             |
| 50           | 0.0538              | 0.3788              | 0.4946             | 0.0728           | 2.87                      |                           | 0.1142             | 0.5359              | 0.3499             |
| 40           | 0.0535              | 0.3790              | 0.4938             | 0.0736           | 2.85                      |                           | 0.1136             | 0.5367              | 0.3496             |
| 20           | 0.0660              | 0.3842              | 0.4572             | 0.0926           | 3.09                      | 3.1 <sup>a</sup>          | 0.1391             | 0.5398              | 0.3212             |
| 10           | 0.0822              | 0.3847              | 0.4190             | 0.1141           | 3.66                      |                           | 0.1718             | 0.5362              | 0.2920             |
| 0            | 0.1194              | 0.3819              | 0.3132             | 0.1856           | 3.65                      |                           | 0.2496             | 0.5322              | 0.2182             |
| 32-66-1      |                     |                     |                    |                  |                           |                           |                    |                     |                    |
| 60           | 0.2118              | 0.5804              | 0.2078             |                  | 1.89                      | 1.78                      | 0.3171             | 0.5792              | 0.1037             |
| 50           | 0.2292              | 0.5780              | 0.1928             |                  | 1.95                      |                           | 0.3377             | 0.5677              | 0.0947             |
| 40           | 0.2385              | 0.5597              | 0.2018             |                  | 1.95                      |                           | 0.3513             | 0.5496              | 0.0991             |
| 30           | 0.2478              | 0.5444              | 0.2078             |                  | 1.96                      |                           | 0.3644             | 0.5337              | 0.1019             |
| 20           | 0.2701              | 0.5493              | 0.1807             |                  | 2.06                      | 1.88 <sup>a</sup>         | 0.3878             | 0.5257              | 0.0865             |
| 10           | 0.2859              | 0.5450              | 0.1691             |                  | 2.14                      |                           | 0.4052             | 0.5149              | 0.0799             |
| 0            | 0.2738              | 0.5950              | 0.1312             |                  | 2.22                      |                           | 0.3834             | 0.5554              | 0.0612             |
| 32-66-5      |                     |                     |                    |                  |                           |                           |                    |                     |                    |
| 60           | 0.3434              | 0.5263              | 0.1303             |                  | 1.35                      | 1.40                      | 0.4655             | 0.4756              | 0.0589             |
| 50           | 0.3734              | 0.5072              | 0.1194             |                  | 1.37                      |                           | 0.4970             | 0.4500              | 0.0530             |
| 40           | 0.3986              | 0.4766              | 0.1248             |                  | 1.38                      |                           | 0.5259             | 0.4192              | 0.0549             |
| 30           | 0.4433              | 0.4507              | 0.1063             |                  | 1.41                      |                           | 0.5689             | 0.3856              | 0.0455             |
| 20           | 0.4702              | 0.4288              | 0.1010             |                  | 1.43                      | 1.45 <sup>a</sup>         | 0.5954             | 0.3620              | 0.0426             |
| 10           | 0.5142              | 0.3999              | 0.0859             |                  | 1.47                      |                           | 0.6353             | 0.3294              | 0.0354             |
| 0            | 0.5434              | 0.3629              | 0.0937             |                  | 1.48                      |                           | 0.6655             | 0.2963              | 0.0382             |
| 32-66-2      |                     |                     |                    |                  |                           |                           |                    |                     |                    |
| 60           | 0.0088              | 0.2143              | 0.6394             | 0.1376           | 2.67                      | 2.85                      | 0.0240             | 0.3916              | 0.5843             |
| 50           | 0.0075              | 0.1964              | 0.6375             | 0.1586           | 2.85                      |                           | 0.0213             | 0.3732              | 0.6056             |
| 40           | 0.0136              | 0.2218              | 0.6216             | 0.1431           | 2.97                      |                           | 0.0369             | 0.4010              | 0.5620             |
| 30           | 0.0156              | 0.2292              | 0.6065             | 0.1487           | 2.97                      |                           | 0.0422             | 0.4123              | 0.5456             |
| 20           | 0.0182              | 0.2425              | 0.5811             | 0.1582           | 2.62                      | 2.92 <sup>a</sup>         | 0.0486             | 0.4328              | 0.5186             |
| 10           | 0.0221              | 0.2906              | 0.5333             | 0.1539           | 2.56                      |                           | 0.0562             | 0.4922              | 0.4516             |
| 0            | 0.0216              | 0.2896              | 0.4560             | 0.2329           | 2.47                      |                           | 0.0588             | 0.5266              | 0.4146             |
| 32-68-3      |                     |                     |                    |                  |                           |                           |                    |                     |                    |
| 60           | 0.4002              | 0.4802              | 0.1196             |                  | 1.13                      | 1.14                      | 0.5264             | 0.4211              | 0.0524             |
| 50           | 0.434               | 0.4528              | 0.1132             |                  | 1.14                      |                           | 0.5610             | 0.3902              | 0.0488             |
| 40           | 0.4686              | 0.4212              | 0.1103             |                  | 1.16                      |                           | 0.5961             | 0.3572              | 0.0468             |
| 30           | 0.5522              | 0.3856              | 0.0623             |                  | 1.20                      |                           | 0.6653             | 0.3097              | 0.0250             |
| 20           | 0.6205              | 0.3318              | 0.0477             |                  | 1.23                      | 1.16 <sup>a</sup>         | 0.7235             | 0.2579              | 0.0185             |
| 10           | 0.7098              | 0.2902              |                    |                  | 1.28                      |                           | 0.7858             | 0.2142              |                    |
| 0            | 0.6247              | 0.3753              |                    |                  | 1.25                      |                           | 0.7140             | 0.2860              |                    |

\* Predicted from  $^{27}\text{Al}$  NMR.

<sup>a</sup> Measured at 25°C.

Table ESI 3. Conditional equilibrium constants ( $I = 1.5$ ) for sample 32-66-1 as function of temperature.

| T (°C) | pH                | K <sub>1</sub> | K <sub>2</sub> |
|--------|-------------------|----------------|----------------|
| 60     | 1.89 <sup>a</sup> | 0.704          | 0.092          |
| 50     | 1.95 <sup>a</sup> | 0.549          | 0.073          |
| 40     | 1.95 <sup>a</sup> | 0.510          | 0.078          |
| 30     | 1.96 <sup>a</sup> | 0.469          | 0.081          |
| 25     | 1.95 <sup>a</sup> | 0.408          | 0.079          |
| 20     | 2.06 <sup>a</sup> | 0.322          | 0.052          |
| 10     | 2.14 <sup>a</sup> | 0.248          | 0.040          |
| 0      | 2.22 <sup>a</sup> | 0.227          | 0.023          |
| 25     | 1.88 <sup>b</sup> |                |                |
| 65     | 1.78 <sup>b</sup> |                |                |
| 25     | 2.0 <sup>c</sup>  | 0.289          | 0.024          |

a: estimated from the relative intensities of peaks in the <sup>27</sup>Al-NMR spectra and conditional equilibrium constants;

b: direct potentiometric measurement

c: calculated using thermodynamic data.
